# Supplementary material for: The Arabidopsis DJ-1a protein confers stress protection through cytosolic SOD activation
Source: Oxford University Press journal article supplement (doi:10.1242/jcs.063222), 2010-04-21
Supplement: jcs063222tables1.pdf [file jcs063222tables1.pdf]

**Table S1. Primers and plasmids used in this research**

| Primer name  | Sequence (5'→3')                       | Note         | Plasmid         |
|--------------|----------------------------------------|--------------|-----------------|
| LP551124     | TATTGTTTGTTCATGTTGGG                   |              |                 |
| RP551124     | AGCAGAGAGACTTACGGGGAG                  |              |                 |
| LP830498     | TGAATGGAATATGTTGGACC                   |              |                 |
| RP830498     | AACCTGAGTCTCAACAGACGC                  |              |                 |
| LBb1         | GCGTGGACCGCTTGCTGCAACT                 |              |                 |
| LB3          | TAGCATCTGAATTCATAACCAATCTCGATACAC      |              |                 |
| 14990-L      | ATGGCTTCATTACGAAAACGGT                 |              |                 |
| 14990-R      | TCACACAAGTGTTCCTTTCC                   |              |                 |
| 53280-L      | ATGGCGTCGTCGTCGTT                      |              |                 |
| 53280-R      | TTACACAAGTGTTCCTTTGAGA                 |              |                 |
| 34020-L      | ATGGGTCTTTAGGATATTCGAT                 |              |                 |
| 34020-R      | TTACTGCCTTGGATACTCATGC                 |              |                 |
| P14990-L     | AATGGCGCGCTGGATGCTTTGTAATTTGCG         | <i>AscI</i>  | pBADG           |
| P14990-R     | AATTTAATTAATGACGAAGCCATTTACGACT        | <i>PacI</i>  |                 |
| P53280-L     | AATGGCGCGCCATAACATAAGATTTACCAGTGCATGA  | <i>AscI</i>  | pBADG           |
| P53280-R     | AATTTAATTAAGATGAAACGGGCTTTATCCTG       | <i>PacI</i>  |                 |
| P34020-L     | AATGGCTCGCCAAATACGTCCATGGATTGGT        | <i>AscI</i>  | pBADG           |
| P34020-R     | AATTTAATTAACCGAGAGTGTTCGCTCT           | <i>PacI</i>  |                 |
| 14990-WEN-L  | AATCTCGAGATGGCTTCATTACGAAAACGGT        | <i>XhoI</i>  | pWEN18, pWEN-NY |
| 14990-WEN-R  | AATGGTACCCACAAGTGTTCCTTTCC             | <i>KpnI</i>  | pWEN-CY         |
| 53280-WEN-L  | AATCTCGAGATGGCGTCGTCGTCGTT             | <i>XhoI</i>  | pWEN18, pWEN-NY |
| 53280-WEN-R  | AATCTCGAGCACAAGTGTTCCTTTGAGA           | <i>XhoI</i>  | pWEN-CY         |
| 34020-WEN-L  | AATGGTACCATGGGTCTTTAGGATATTCGAT        | <i>KpnI</i>  | pWEN18, pWEN-NY |
| 34020-WEN-R  | AATGGTACCCTGCCTTGGATACTCATGC           | <i>KpnI</i>  | pWEN-CY         |
| 14990-ET-L   | AATGGATCCATGGCTTCATTACGAAAACGGT        | <i>BamHI</i> | pET28a          |
| 14990-ET-R   | ATTCTCGAGCACAAGTGTTCCTTTCC             | <i>XhoI</i>  |                 |
| 53280-ET-L   | ATTGGATCCATGGCGTCGTCGTCGTT             | <i>BamHI</i> | pET28a          |
| 53280-ET-R   | AATCTCGAGCACAAGTGTTCCTTTGAGA           | <i>XhoI</i>  |                 |
| 34020-ET-L   | AATGAATTCATGGGTCTTTAGGATATTCGAT        | <i>EcoRI</i> | pET28a          |
| 34020-ET-R   | ATTGCGGCCGCTGCCTTGGATACTCATGC          | <i>NotI</i>  |                 |
| 14990-YTH-L  | ATTGGCCATGGAGGCCATGGCTTCATTACGAAAACGGT | <i>NcoI</i>  | pGADT7, pGBKT7  |
| 14990-YTH-R  | ATTCCCGGGCACAAGTGTTCCTTTCC             | <i>SmaI</i>  |                 |
| 53280-YTH-L  | ATTGGCCATGGCGTCGTCGTCGTT               | <i>NcoI</i>  | pGADT7, pGBKT7  |
| 53280-YTH-R  | ATTCCCGGGCACAAGTGTTCCTTTGAGA           | <i>SmaI</i>  |                 |
| 34020-YTH-L  | AATGAATTCATGGGTCTTTAGGATATTCGAT        | <i>EcoRI</i> | pGADT7, pGBKT7  |
| 34020-YTH-R  | ATTCCCGGGCTGCCTTGGATACTCATGC           | <i>SmaI</i>  |                 |
| CSD1-WEN-L   | AATCTCGAGATGGCGAAAGGAGTTGCAGT          | <i>XhoI</i>  | pWEN18, pWEN-NY |
| CSD1-WEN-R   | AATGGTACC GCCCTGGAGCAATGATG            | <i>KpnI</i>  | pWEN-CY         |
| DJI-ET-L     | AATGAATTCATGGCTTCCAAAAGAGCTCTGGTCA     | <i>EcoRI</i> | pET28a          |
| DJI-ET-R     | ATTCTCGAGGTCTTTAAGAACAAGTGGAGCCTTC     | <i>XhoI</i>  |                 |
| SOD1-ET-L    | ATTCATATGGCGACGAAGCCCGTGT              | <i>NdeI</i>  | pET28a          |
| SOD1-ET-R    | ATTGAATTCCTTGGGCGATCCCAATTACA          | <i>EcoRI</i> |                 |
| DJI-WEN-L    | ATTCTCGAGATGGCTTCCAAAAGAGCTCTGGTCA     | <i>XhoI</i>  | pWEN-NY         |
| DJI-WEN-R    | AATGGTACCGTCTTTAAGAACAAGTGGAGCCTTC     | <i>KpnI</i>  | pWEN-CY         |
| SOD1-WEN-L   | ATTCTCGAGATGGCGACGAAGGCCGTGT           | <i>XhoI</i>  | pWEN-NY         |
| SOD1-WEN-R   | AATGGTACCTTGGGCGATCCCAATTACA           | <i>KpnI</i>  | pWEN-CY         |
| HsGPX2-WEN-L | AATCTCGAGATGGCTTTCATTGCCAAGTC          | <i>XhoI</i>  | pWEN-NY         |
| HsGPX2-WEN-R | AATGGTACCTATGGCAACTTTAAGGAGGCGCTTG     | <i>KpnI</i>  | pWEN-CY         |
| AtGPX2-WEN-L | AATCTCGAGATGGCGATGAATCTCCAA            | <i>XhoI</i>  | pWEN-NY         |
| AtGPX2-WEN-R | AATGGTACCAGAAGAGGCTGTCCCAAC            | <i>KpnI</i>  | pWEN-CY         |
